# Supplementary material for: Preparation, Characterization and Properties of Alginate/Poly(γ-glutamic acid) Composite Microparticles
Source: PubMed Central journal article supplement (PMC5408237; doi:10.3390/md15040091), 2017-04-11
Supplement: marinedrugs-15-00091-s001.pdf [file marinedrugs-15-00091-s001.pdf]

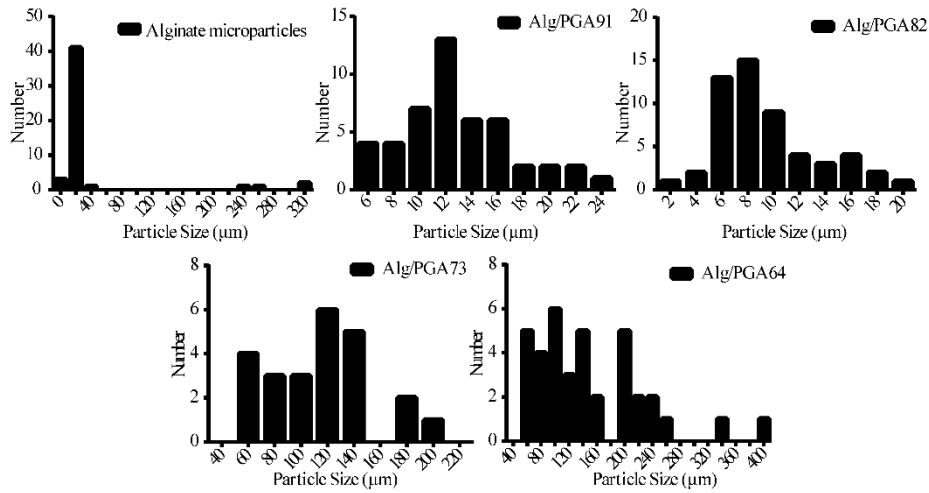

**Figure S1.** Particles size distribution of alginate microparticles and various composite microparticles (Alg/PGA91, Alg/PGA82, Alg/PGA73, Alg/PGA64 represent composite microparticles whose mass ratio is  $m_{\text{Alg}}: m_{\text{PGA}} = 9:1, 8:2, 7:3, 6:4$  respectively.)

**Table S1.** Size distribution statistic data of various microparticles

|                                                        | Alginate | Alg/PGA91 | Alg/PGA82 | Alg/PGA73 | Alg/PGA64 |
|--------------------------------------------------------|----------|-----------|-----------|-----------|-----------|
| <b>Mean (<math>\mu\text{m}</math>)</b>                 | 39.0     | 13.0      | 9.4       | 117.2     | 148.8     |
| <b>Std. Deviation (<math>\mu\text{m}</math>)</b>       | 74.0     | 4.2       | 3.8       | 38.0      | 78.9      |
| <b>Std. Error of Mean (<math>\mu\text{m}</math>)</b>   | 10.6     | 0.6       | 0.5       | 7.8       | 13.0      |
| <b>25% Percentile (<math>\mu\text{m}</math>)</b>       | 12.2     | 10.0      | 6.7       | 83.6      | 89.6      |
| <b>Median (<math>\mu\text{m}</math>)</b>               | 17.5     | 12.6      | 8.5       | 120.0     | 132.2     |
| <b>75% Percentile (<math>\mu\text{m}</math>)</b>       | 22.9     | 15.4      | 11.2      | 139.8     | 204.3     |
| <b>Maximum (<math>\mu\text{m}</math>)</b>              | 311.4    | 23.4      | 19.2      | 209.4     | 390.9     |
| <b>Lower 95% CI of mean (<math>\mu\text{m}</math>)</b> | 17.8     | 11.7      | 8.4       | 101.1     | 122.5     |
| <b>Upper 95% CI of mean (<math>\mu\text{m}</math>)</b> | 60.3     | 14.2      | 10.5      | 133.2     | 175.1     |

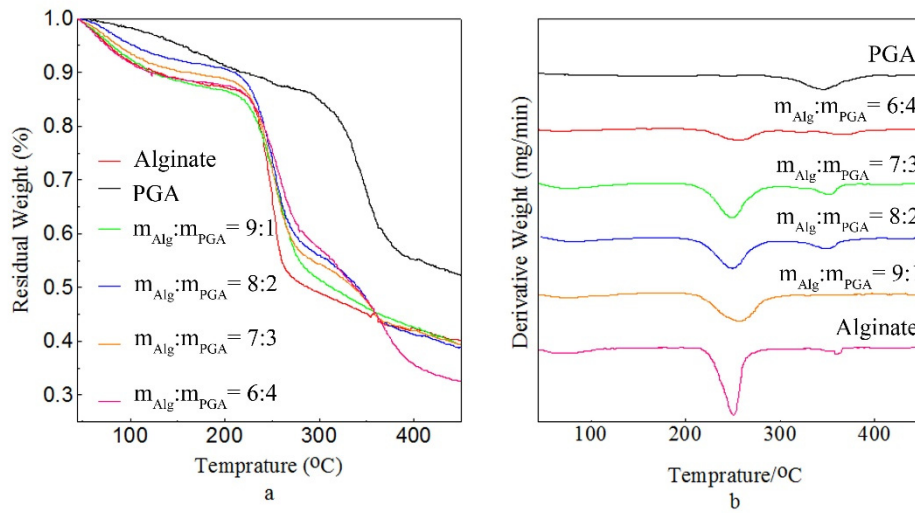

**Figure S2.** TG (a) and DTG (b) curves of Alginate, PGA and Alg/PGA microparticles prepared at different weight ratio.
